# Supplementary material for: Probing the interaction of Rh, Co and bimetallic Rh–Co nanoparticles with the CeO2 support: catalytic materials for alternative energy generation
Source: Royal Society of Chemistry journal article supplement (doi:10.1039/c5cp03549j), 2015-01-01
Supplement: c5cp03549j1.pdf [file c5cp03549j1.pdf]

## Probing the Interaction of Rh, Co and Bimetallic Rh-Co Nanoparticles with CeO<sub>2</sub> Support: Catalytic Materials for Alternative Energy Generation

E. Varga,<sup>a</sup> P. Pusztai,<sup>b</sup> L. Óvári,<sup>c</sup> A. Oszkó,<sup>a</sup> A. Erdőhelyi,<sup>a</sup> C. Papp,<sup>d</sup> H-P. Steinrück,<sup>d</sup>  
Z. Kónya,<sup>b,c</sup> J. Kiss,<sup>a,c\*</sup>

<sup>a</sup>Department of Physical Chemistry and Materials Science, University of Szeged, H-6720 Szeged, Aradi v.t. 1

<sup>b</sup>Department of Applied and Environmental Chemistry, University of Szeged, H-6720 Szeged,

<sup>c</sup>MTA-SZTE Reaction Kinetics and Surface Chemistry Research Group, H-6720 Szeged, Rerrich B. t. 1., Hungary

<sup>d</sup>Chair of Physical Chemistry II, University of Erlangen-Nürnberg, Egerlandstr.3, 91058 Erlangen, Germany

### Supporting Information

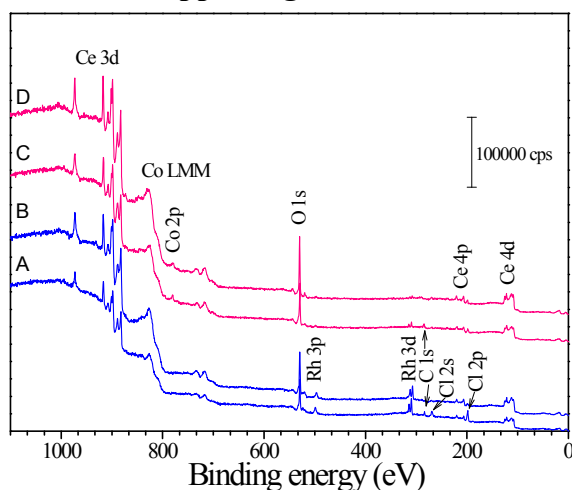

**Figure S1.** Survey spectra of 5% Rh/ceria in the as received form (A) and after reduction at 773 K for 1 h (B), as well as the same spectra of 0.1% Rh+10% Co/ceria (C,D), respectively.

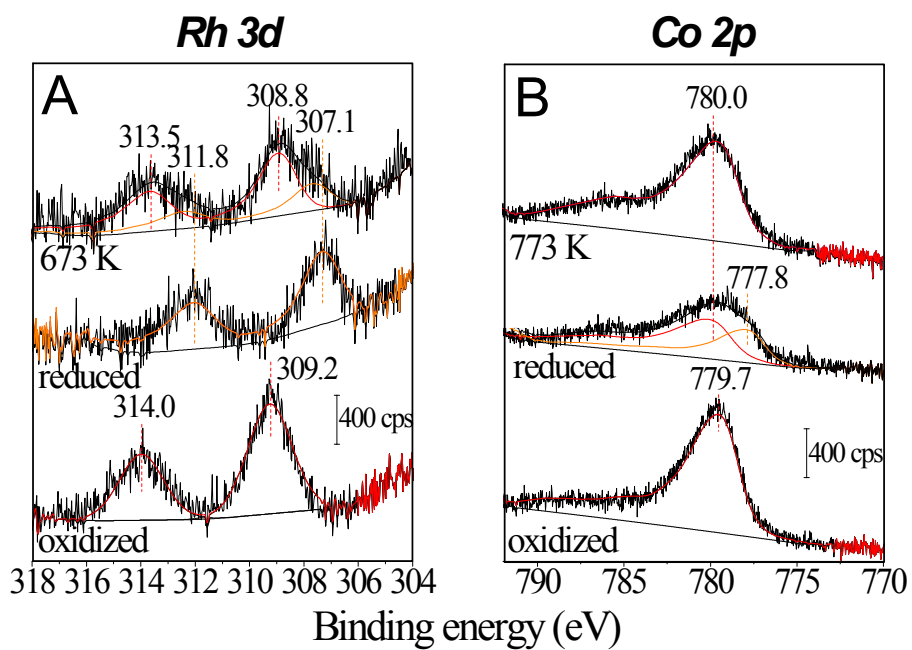

**Figure S2.** Deconvoluted Rh 3d spectra of 1% Rh/ceria (A) and Co 2p spectra of 10% Co/ceria (B) after oxidation, reduction and heating in N<sub>2</sub> up to 673 or 773 K.
